# Supplementary material for: Highly diastereo- and enantioselective organocatalytic synthesis of trifluoromethylated erythritols based on the in situ generation of unstable trifluoroacetaldehyde
Source: Royal Society of Chemistry journal article supplement (doi:10.1039/d0ob02067b), 2020-12-08
Supplement: d0ob02067b1.pdf [file d0ob02067b1.pdf]

(Supporting Information)

**Highly Diastereo- and Enantioselective Organocatalytic Synthesis of  
Trifluoromethylated Erythritols Based on the in situ Generation of  
Unstable Trifluoroacetaldehyde**

Kazumasa Funabiki,<sup>†\*</sup> Toshiya Gotoh,<sup>†</sup> Ryunosuke Kani,<sup>†</sup> Toshiyasu Inuzuka,<sup>‡</sup> and Yasuhiro  
Kubota<sup>†</sup>

<sup>†</sup> Department of Chemistry and Biomolecular Science, Gifu University, 1-1, Yanagido, Gifu 501-  
1193, Japan

<sup>‡</sup> Division of Instrumental Analysis, Life Science Research Center, Gifu University, 1-1 Yanagido,  
Gifu 501-1193, Japan

*E-mail funabiki@gifu-u.ac.jp*

(Contents)

|                                                                                                       |          |
|-------------------------------------------------------------------------------------------------------|----------|
| <sup>1</sup> H, <sup>13</sup> C, <sup>19</sup> F NMR, HRMS, and IR for <i>anti</i> - <b>4a</b> .....  | p. 2-4   |
| <sup>1</sup> H, <sup>13</sup> C, <sup>19</sup> F NMR, HRMS, and IR for <i>anti</i> - <b>4b</b> .....  | p. 5-7   |
| <sup>1</sup> H, <sup>13</sup> C, <sup>19</sup> F NMR, HRMS, and IR for (5 <i>R</i> )- <b>5a</b> ..... | p. 8-10  |
| <sup>1</sup> H, <sup>13</sup> C, <sup>19</sup> F NMR, HRMS, and IR for (5 <i>R</i> )- <b>5b</b> ..... | p. 11-13 |
| <sup>1</sup> H, <sup>13</sup> C, <sup>19</sup> F NMR, HRMS, and IR for <b>6a</b> .....                | p. 14-16 |
| <sup>1</sup> H, <sup>13</sup> C, <sup>19</sup> F NMR, HRMS, and IR for <b>6b</b> .....                | p. 17-19 |
| Enantiomer separation by GC or HPLC for <i>anti</i> - <b>4a</b> and <i>anti</i> - <b>4b</b> .....     | p. 20-22 |

**(S)-2,2-Dimethyl-4-((R)-2,2,2-trifluoro-1-hydroxyethyl)-1,3-dioxan-5-one**  
**(anti-4a)**

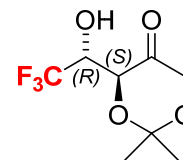

**<sup>1</sup>H NMR**

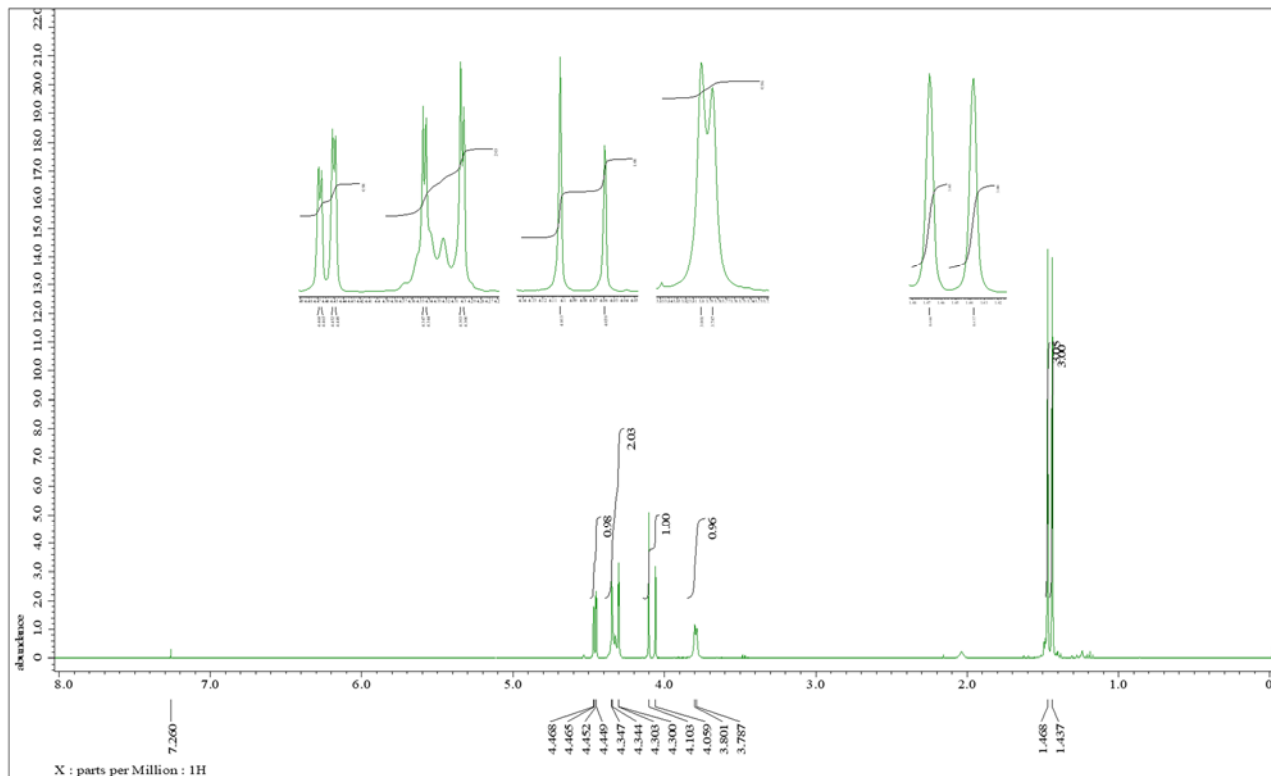

**<sup>13</sup>C NMR**

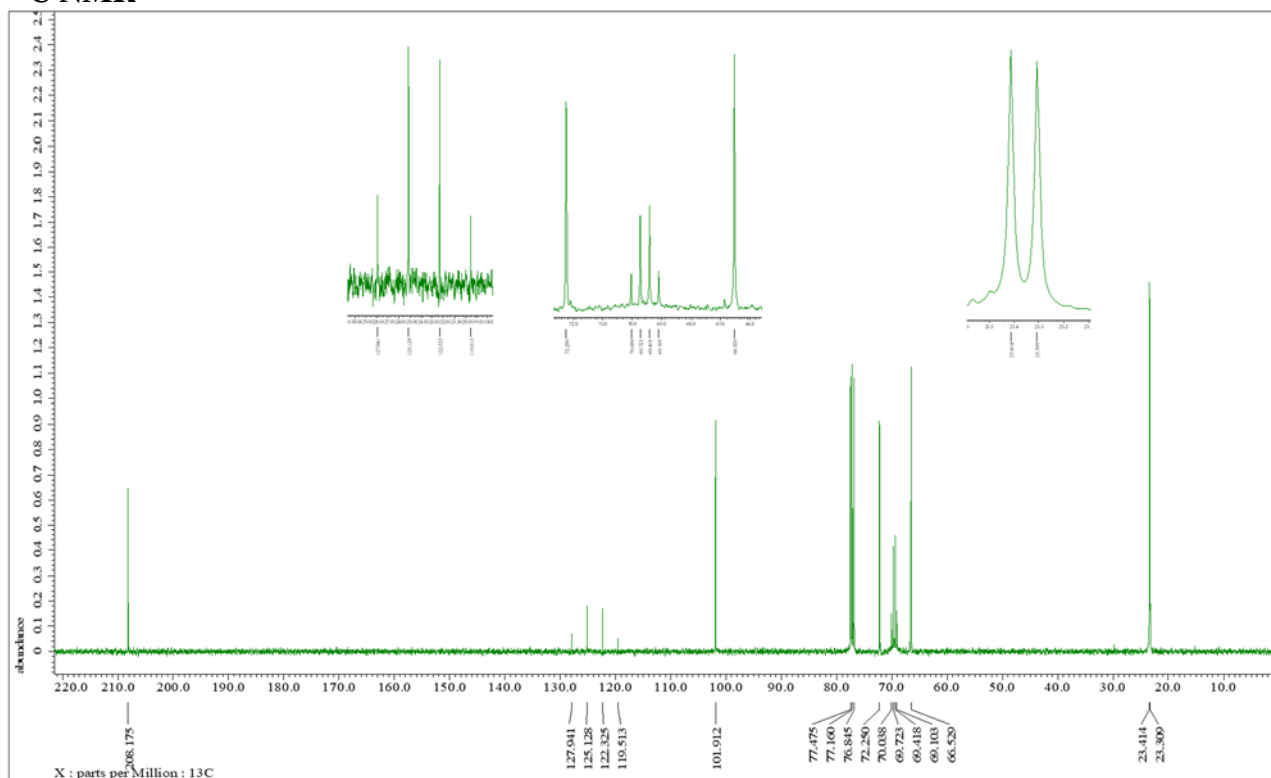

# <sup>19</sup>F NMR

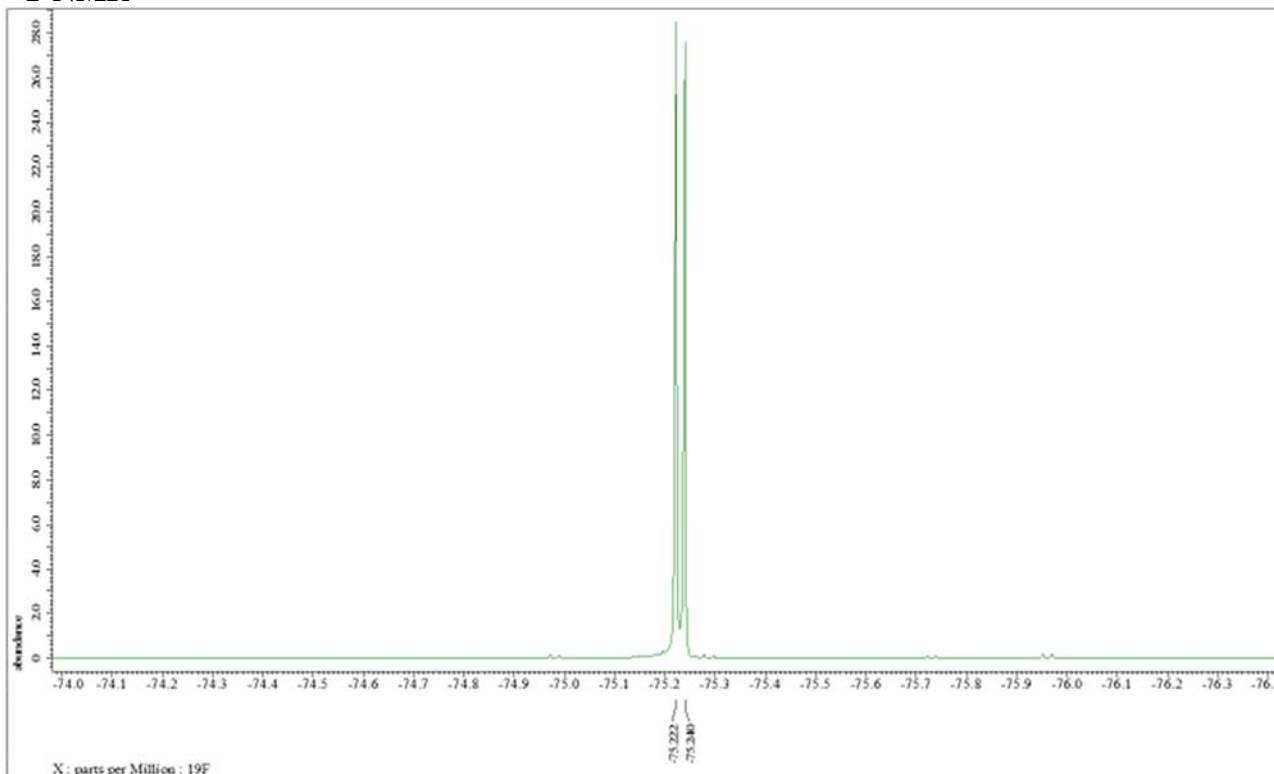

# HRMS

## Elemental Composition Report

### Single Mass Analysis

Tolerance = 100.0 PPM / DBE: min = -10.0, max = 100.0

Element prediction: Off

Number of isotope peaks used for i-FIT = 3

Monoisotopic Mass, Even Electron Ions

5 formula(e) evaluated with 1 results within limits (all results (up to 1000) for each mass)

Elements Used:

C: 8-8 H: 11-12 O: 4-4 Na: 0-1 14N: 0-2 19F: 3-3

20190708p-1 24 (0.842)

1: TOF MS ES+

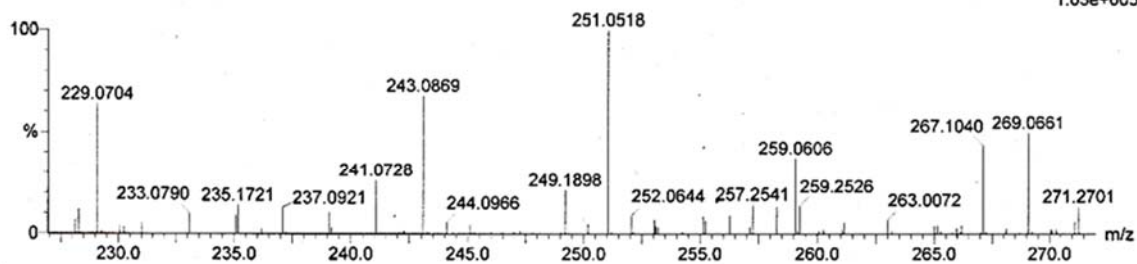

| Mass     | Calc. Mass | mDa | PPM | DBE | i-FIT | i-FIT (Norm) | Formula        |
|----------|------------|-----|-----|-----|-------|--------------|----------------|
| 229.0704 | 229.0688   | 1.6 | 7.0 | 1.5 | 299.4 | 0.0          | C8 H12 O4 19F3 |

# IR

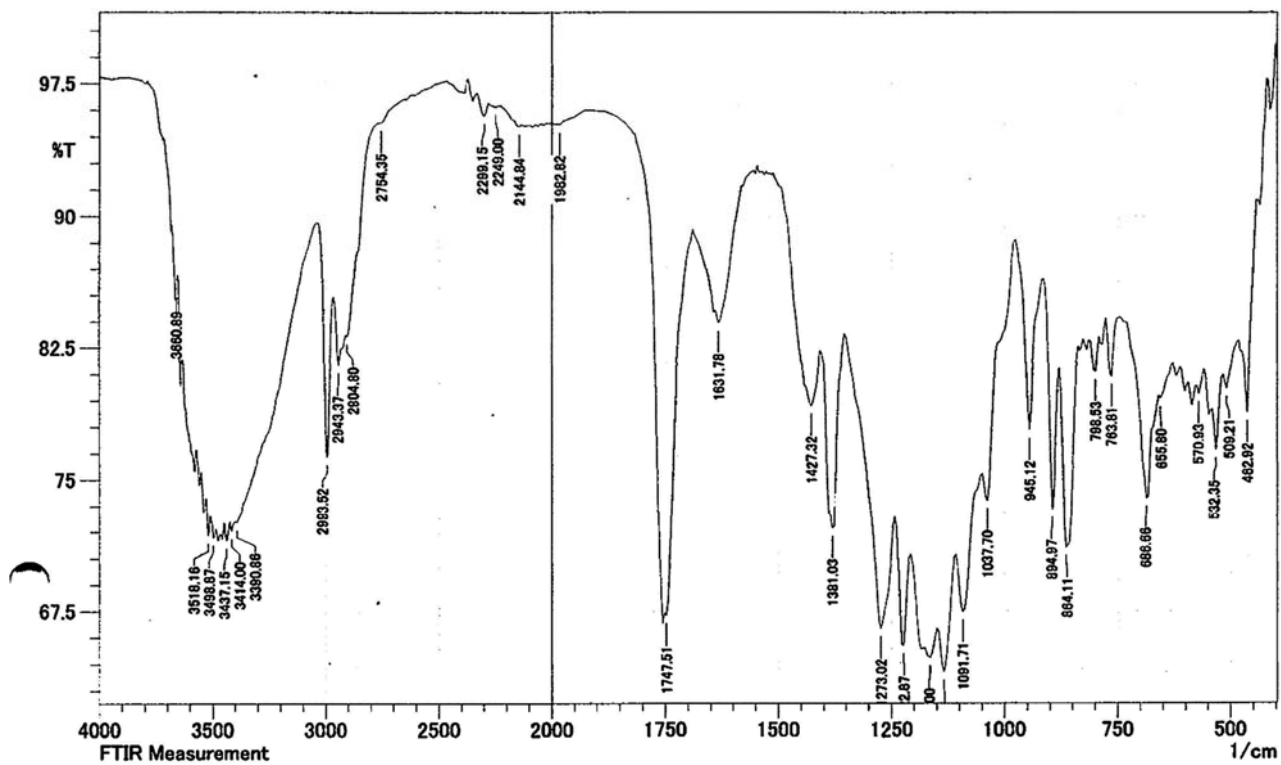

**(S)-2,2-Dimethyl-4-((R)-2,2,3,3,3-pentafluoro-1-hydroxypropyl)-1,3-dioxan-5-one (anti-4b)**

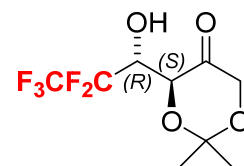

**<sup>1</sup>H NMR**

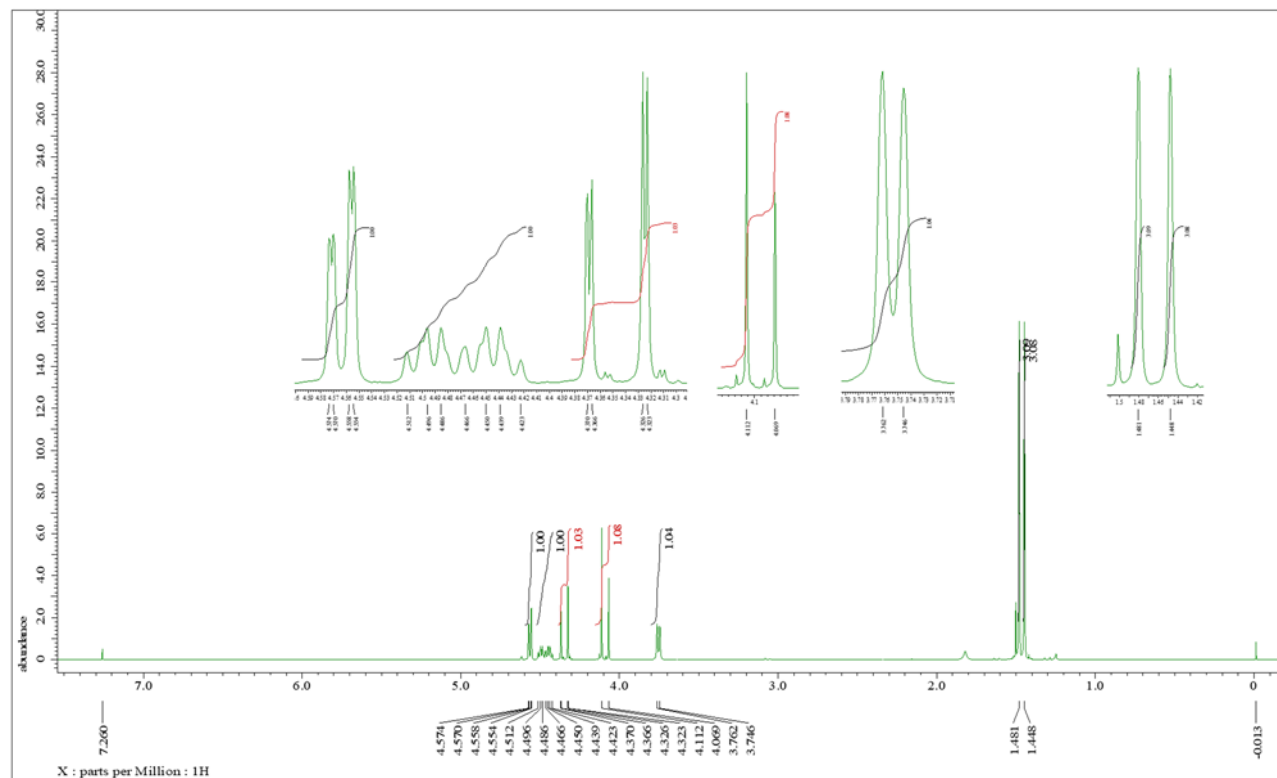

**<sup>13</sup>C NMR**

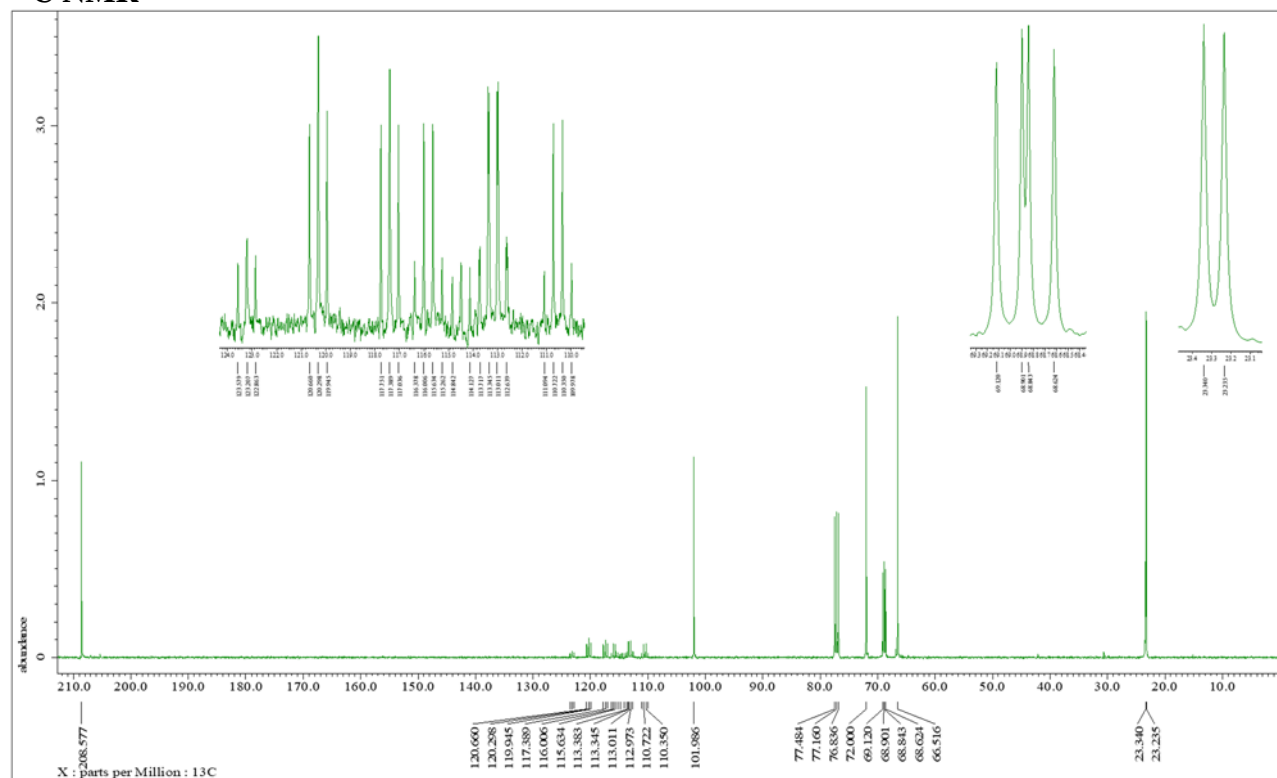

# <sup>19</sup>F NMR

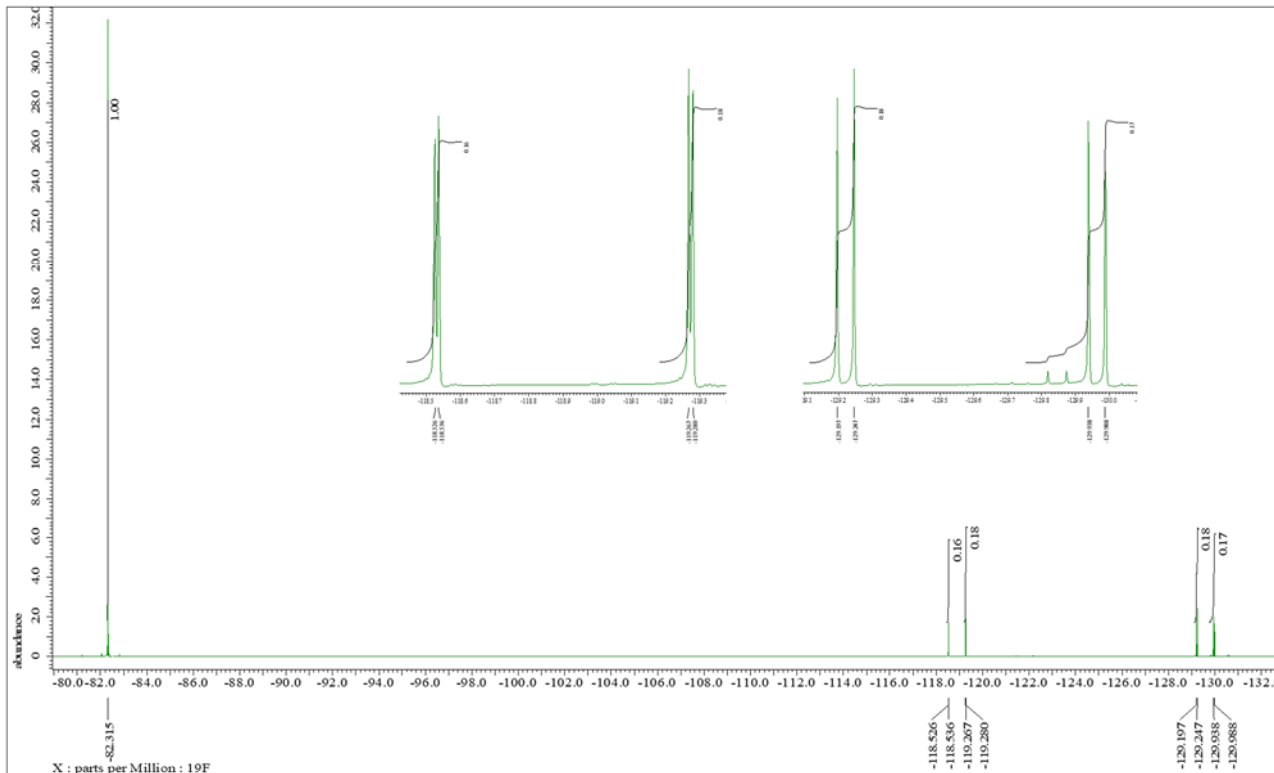

# HRMS

## Elemental Composition Report

### Single Mass Analysis

Tolerance = 100.0 PPM / DBE: min = -10.0, max = 100.0

Element prediction: Off

Number of isotope peaks used for i-FIT = 3

Monoisotopic Mass, Even Electron Ions

5 formula(e) evaluated with 1 results within limits (all results (up to 1000) for each mass)

Elements Used:

C: 9-9 H: 11-12 14N: 0-2 O: 4-4 19F: 5-5 Na: 0-1

20190708p-4 10 (0.353)

1: TOF MS ES+

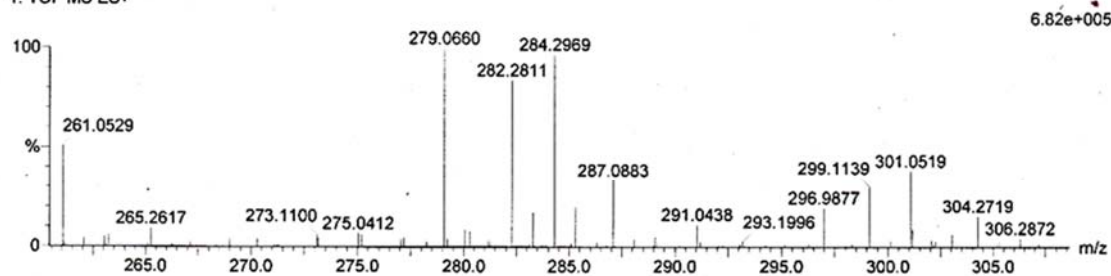

| Mass     | Calc. Mass | mDa | PPM | DBE | i-FIT | i-FIT (Norm) | Formula        |
|----------|------------|-----|-----|-----|-------|--------------|----------------|
| 279.0660 | 279.0656   | 0.4 | 1.4 | 1.5 | 431.6 | 0.0          | C9 H12 O4 19F5 |

# IR

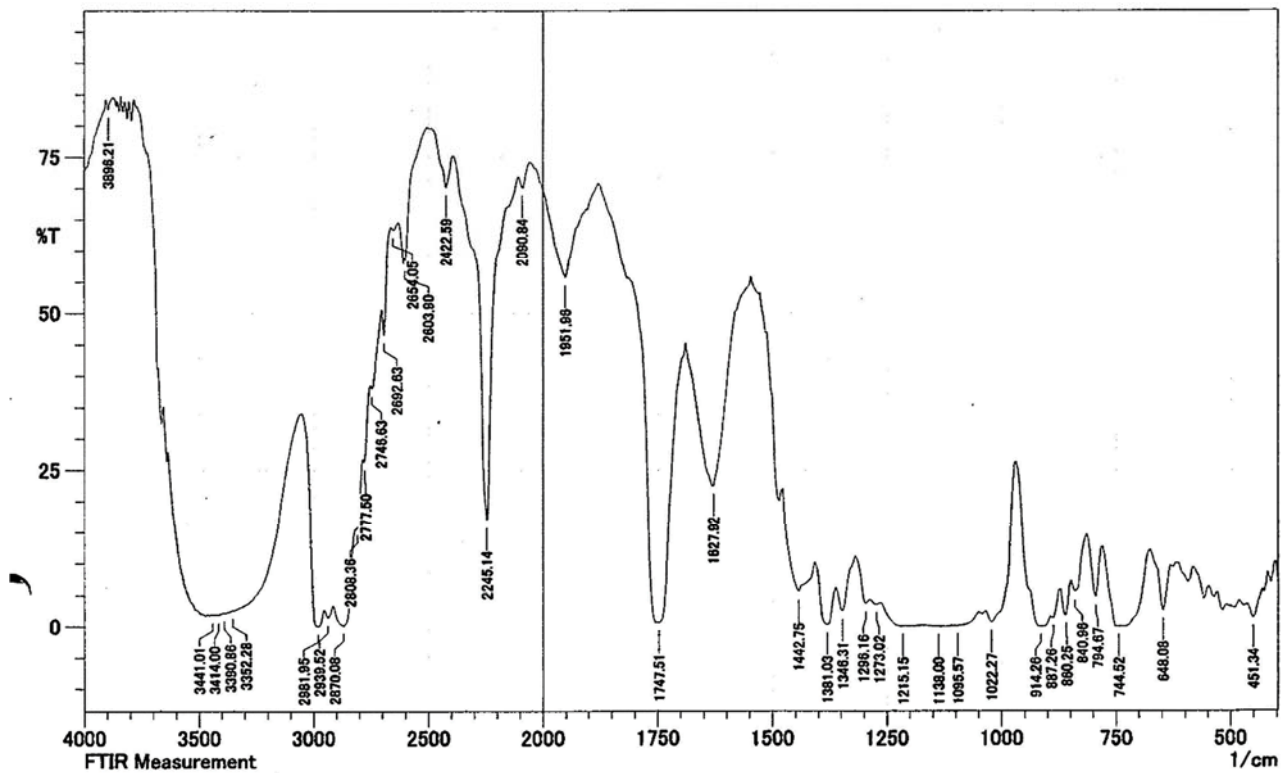

**(4*R*,5*R*)-2,2-Dimethyl-4-((*R*)-2,2,2-trifluoro-1-hydroxyethyl)-1,3-dioxan-5-ol**  
**((5*R*)-5a)**

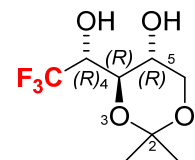

**<sup>1</sup>H NMR**

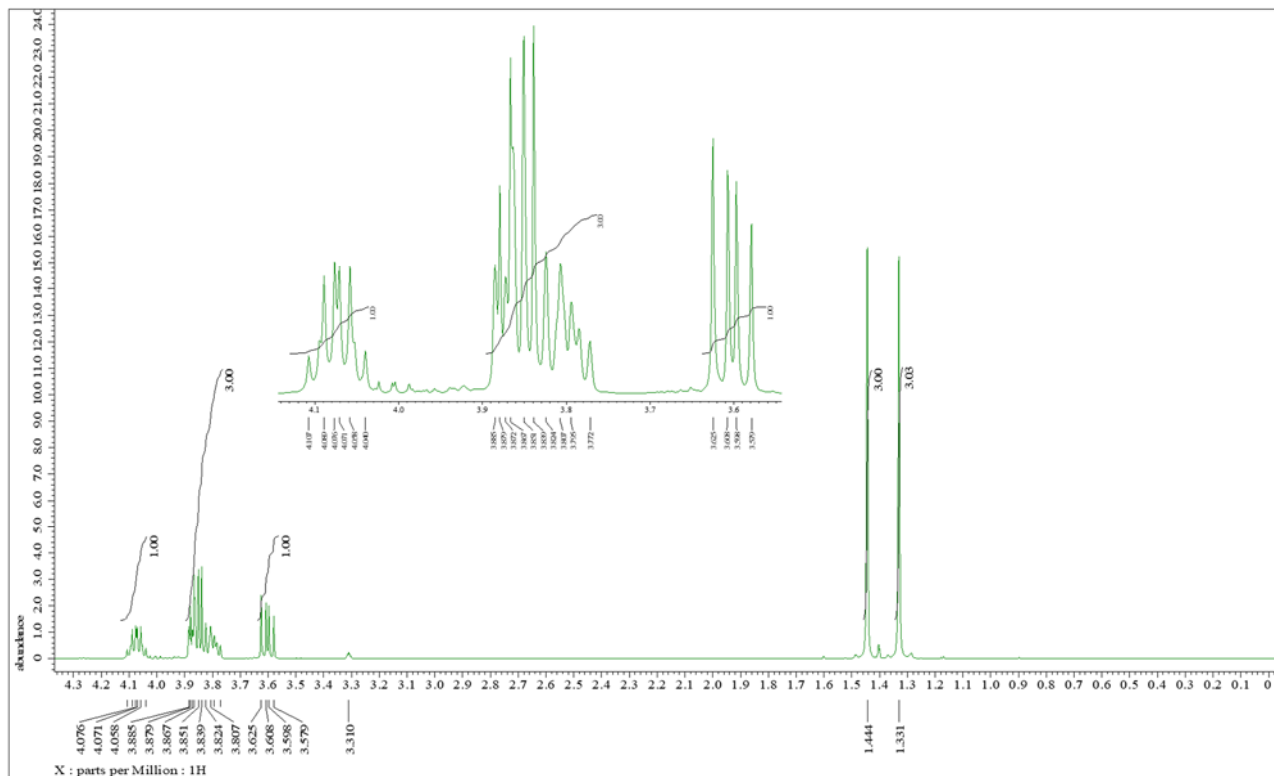

**<sup>13</sup>C NMR**

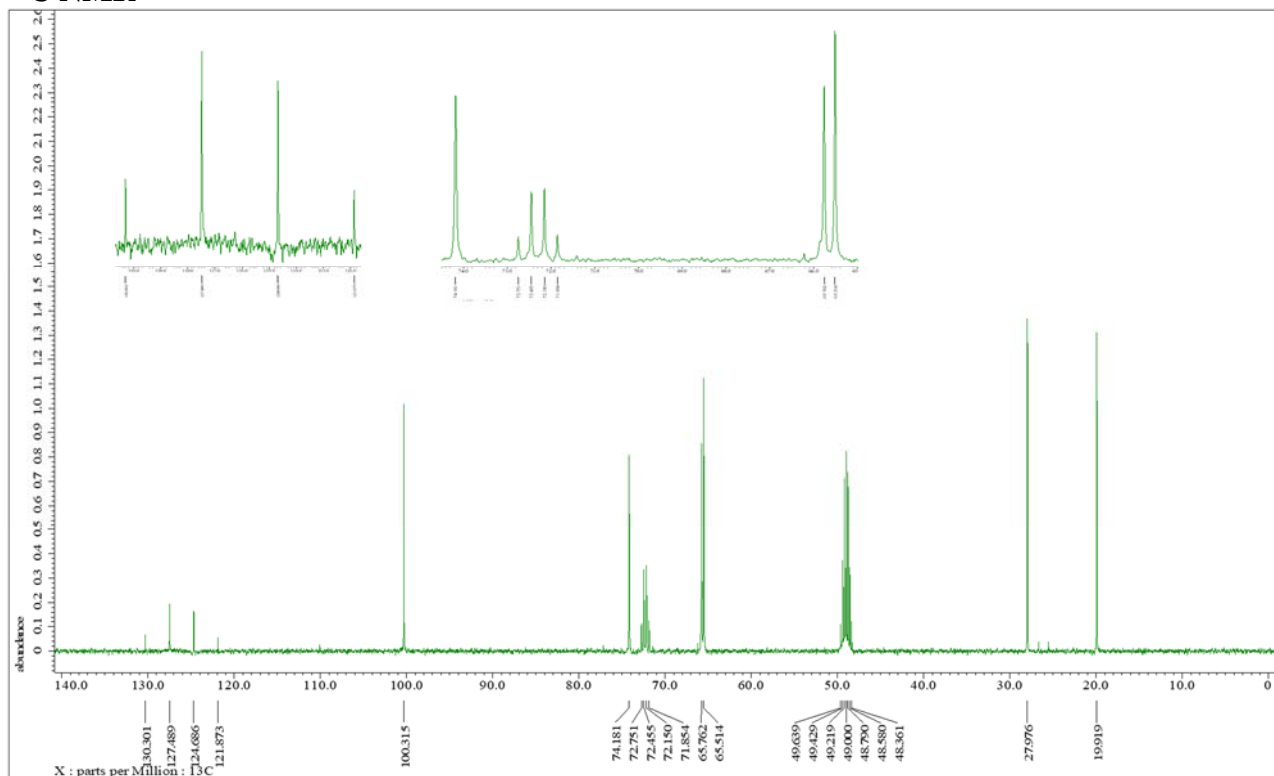



# <sup>19</sup>F NMR

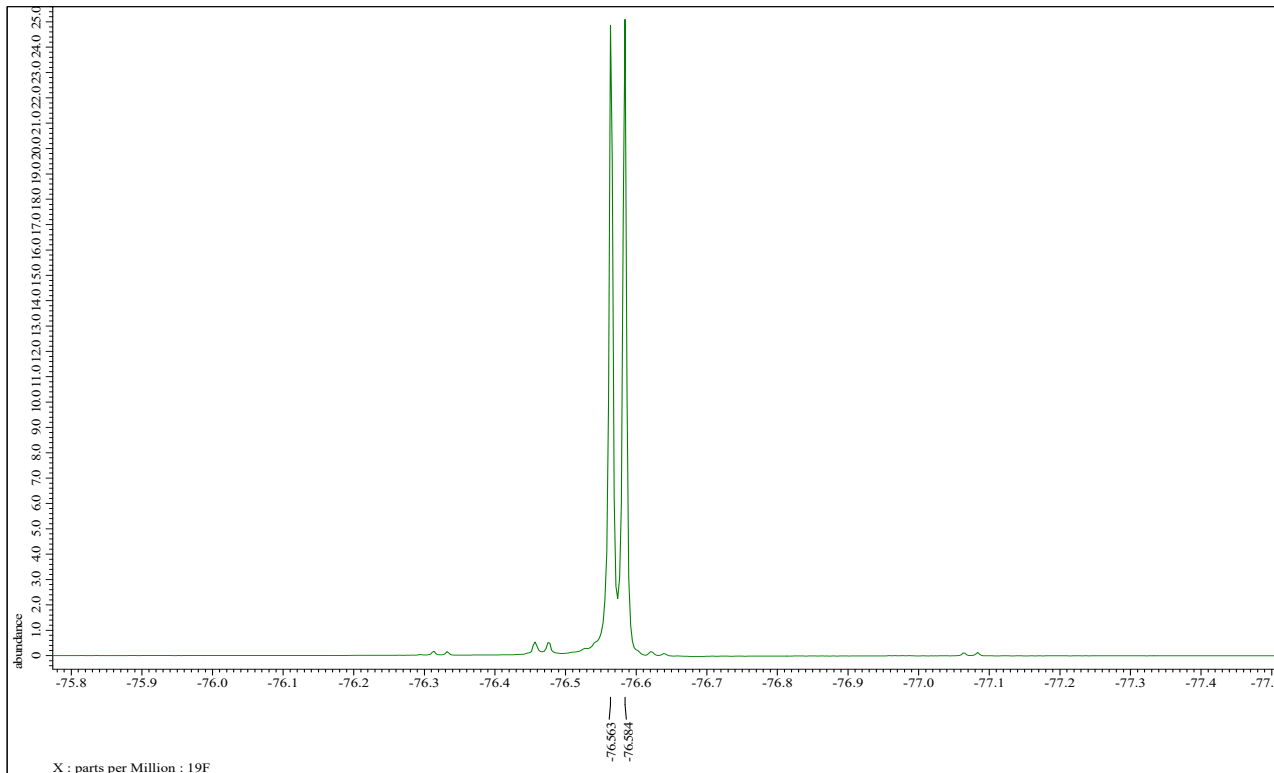

# HRMS

## Elemental Composition Report

### Single Mass Analysis

Tolerance = 500.0 PPM / DBE: min = -10.0, max = 100.0  
 Element prediction: Off  
 Number of isotope peaks used for i-FIT = 3

Monoisotopic Mass, Even Electron Ions

1 formula(e) evaluated with 1 results within limits (all results (up to 1000) for each mass)

Elements Used:

C: 8-8 H: 13-14 O: 4-4 F: 3-3 Na: 0-1

20190410-5 11 (0.387) Cm (11:15)

1: TOF MS ES+

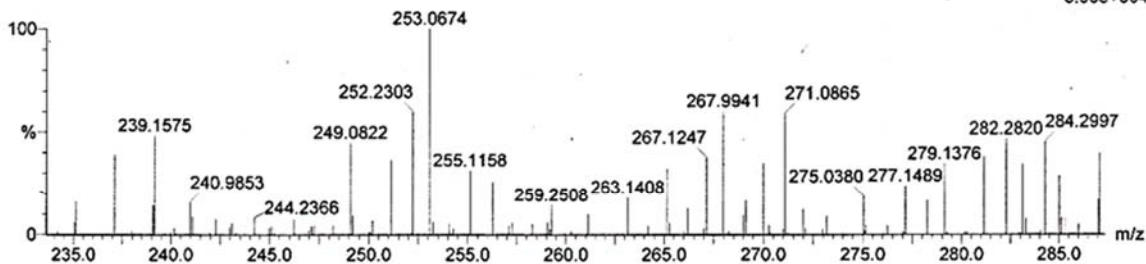

Minimum: -10.0  
 Maximum: 100.0 500.0 100.0

| Mass     | Calc. Mass | mDa | PPM | DBE | i-FIT | i-FIT (Norm) | Formula         |
|----------|------------|-----|-----|-----|-------|--------------|-----------------|
| 253.0674 | 253.0664   | 1.0 | 4.0 | 0.5 | 305.6 | 0.0          | C8 H13 O4 F3 Na |

# IR

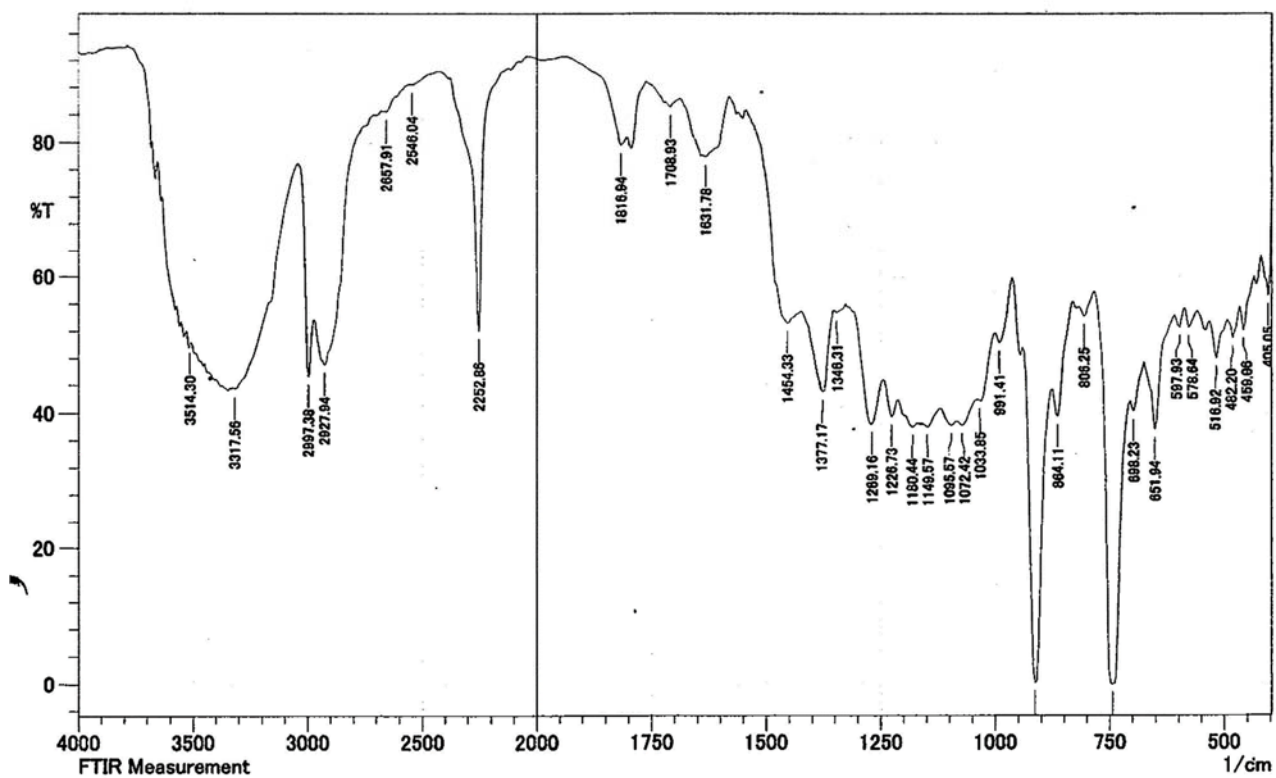

**(4*R*,5*R*)-2,2-Dimethyl-4-((*R*)-2,2,3,3,3-pentafluoro-1-hydroxypropyl)-1,3-dioxan-5-ol ((5*R*)-5b)**

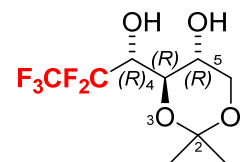

**<sup>1</sup>H NMR**

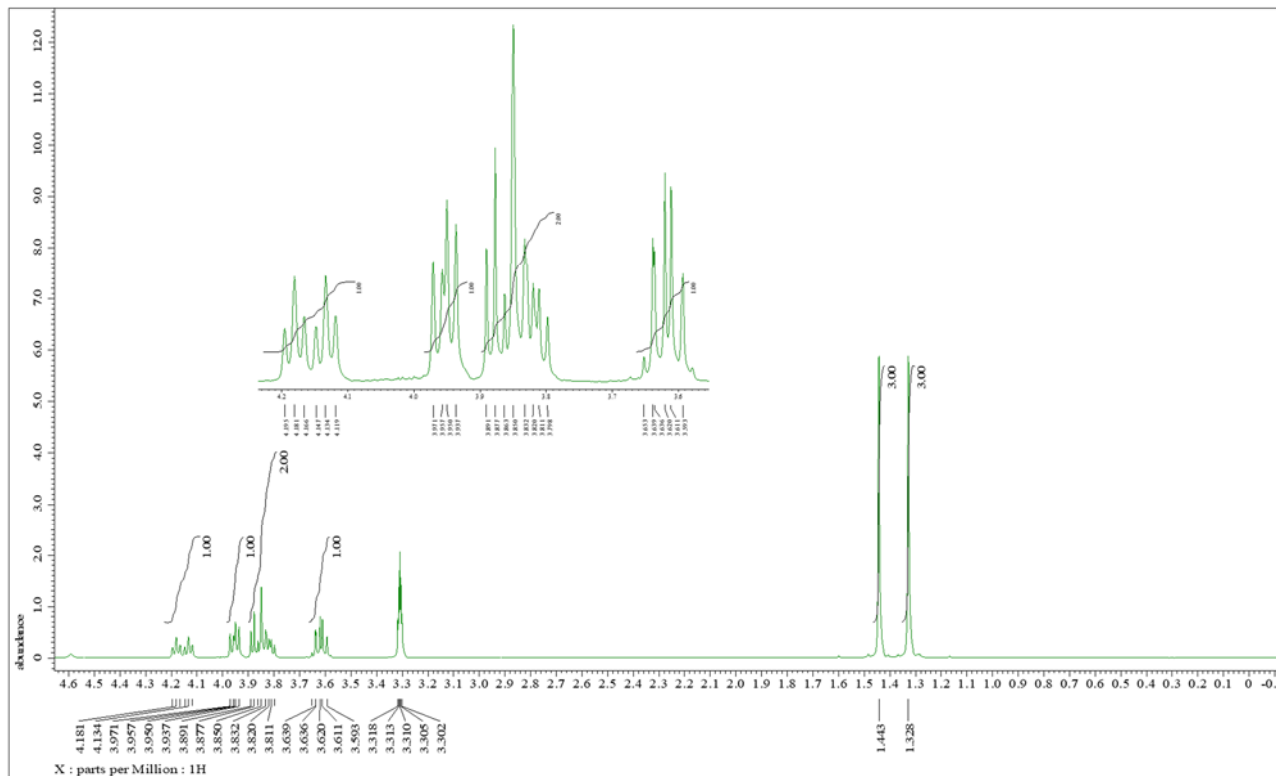

**<sup>13</sup>C NMR**

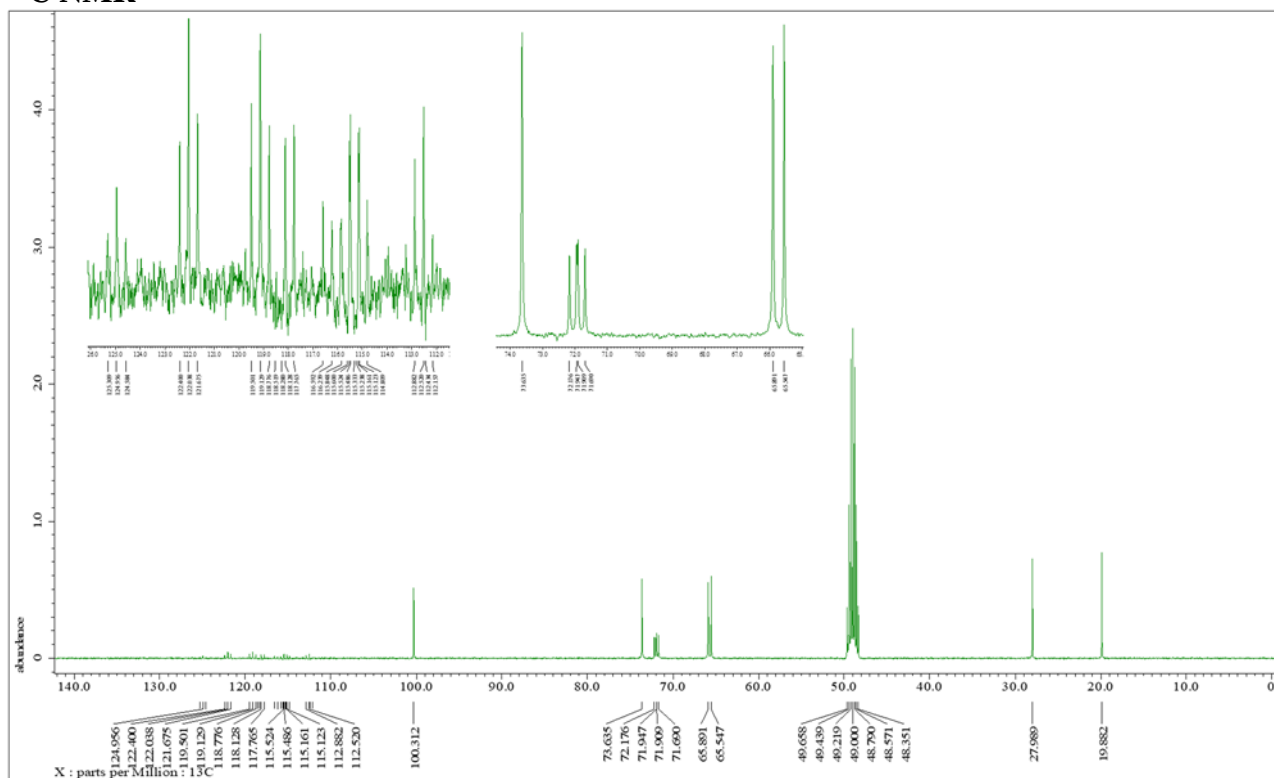

# <sup>19</sup>F NMR

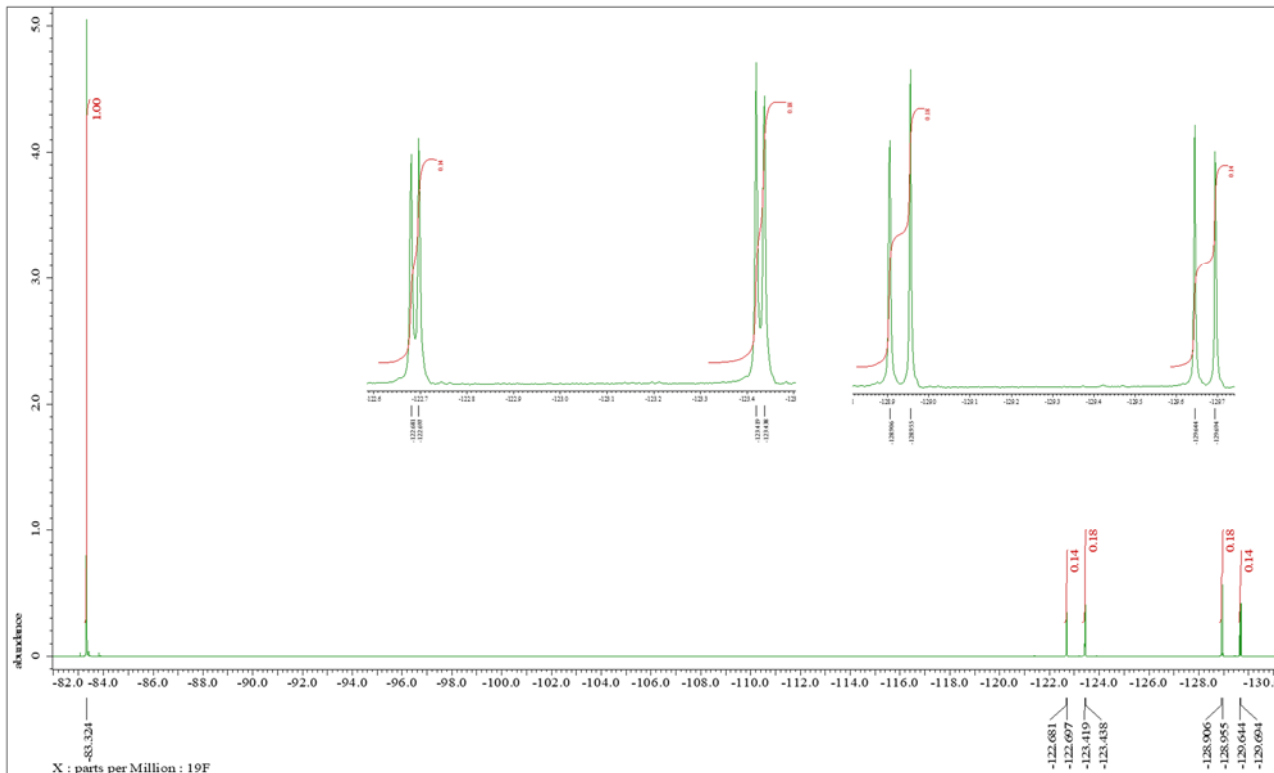

# HRMS

## Elemental Composition Report

### Single Mass Analysis

Tolerance = 100.0 PPM / DBE: min = -10.0, max = 100.0

Element prediction: Off

Number of isotope peaks used for i-FIT = 3

Monoisotopic Mass, Even Electron Ions

2 formula(e) evaluated with 1 results within limits (all results (up to 1000) for each mass)

Elements Used:

C: 9-9 H: 13-14 14N: 0-2 O: 4-4 19F: 5-5 Na: 0-1

20190708p-5 11 (0.387)

1: TOF MS ES+

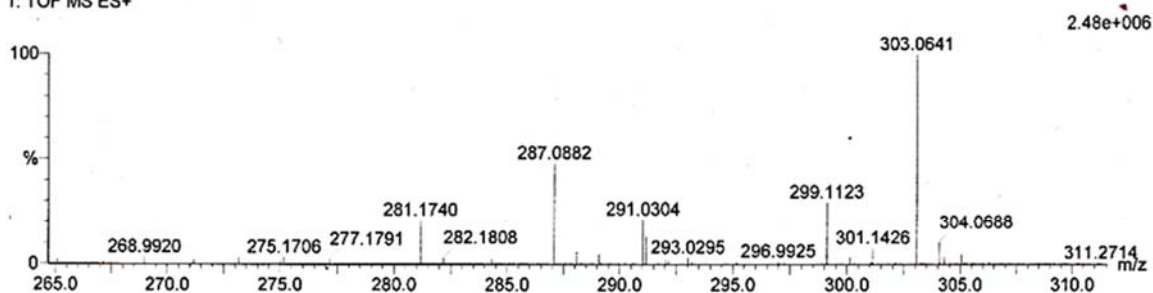

Minimum: -10.0  
Maximum: 100.0 100.0 100.0

| Mass     | Calc. Mass | mDa | PPM | DBE | i-FIT | i-FIT (Norm) | Formula           |
|----------|------------|-----|-----|-----|-------|--------------|-------------------|
| 303.0641 | 303.0632   | 0.9 | 3.0 | 0.5 | 575.4 | 0.0          | C9 H13 O4 19F5 Na |

# IR

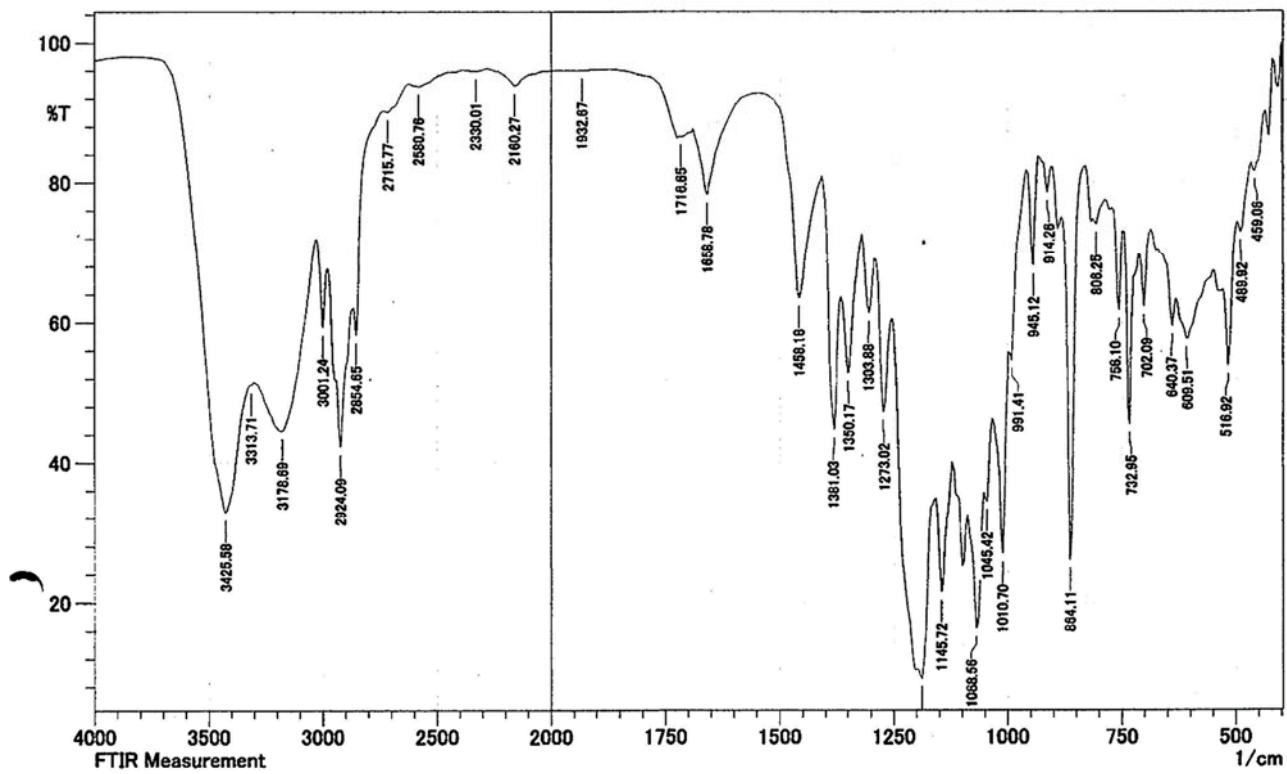

(2*R*,3*R*,4*R*)-5,5,5-Trifluoropentane-1,2,3,4-tetraol (6a)

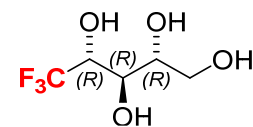

<sup>1</sup>H NMR

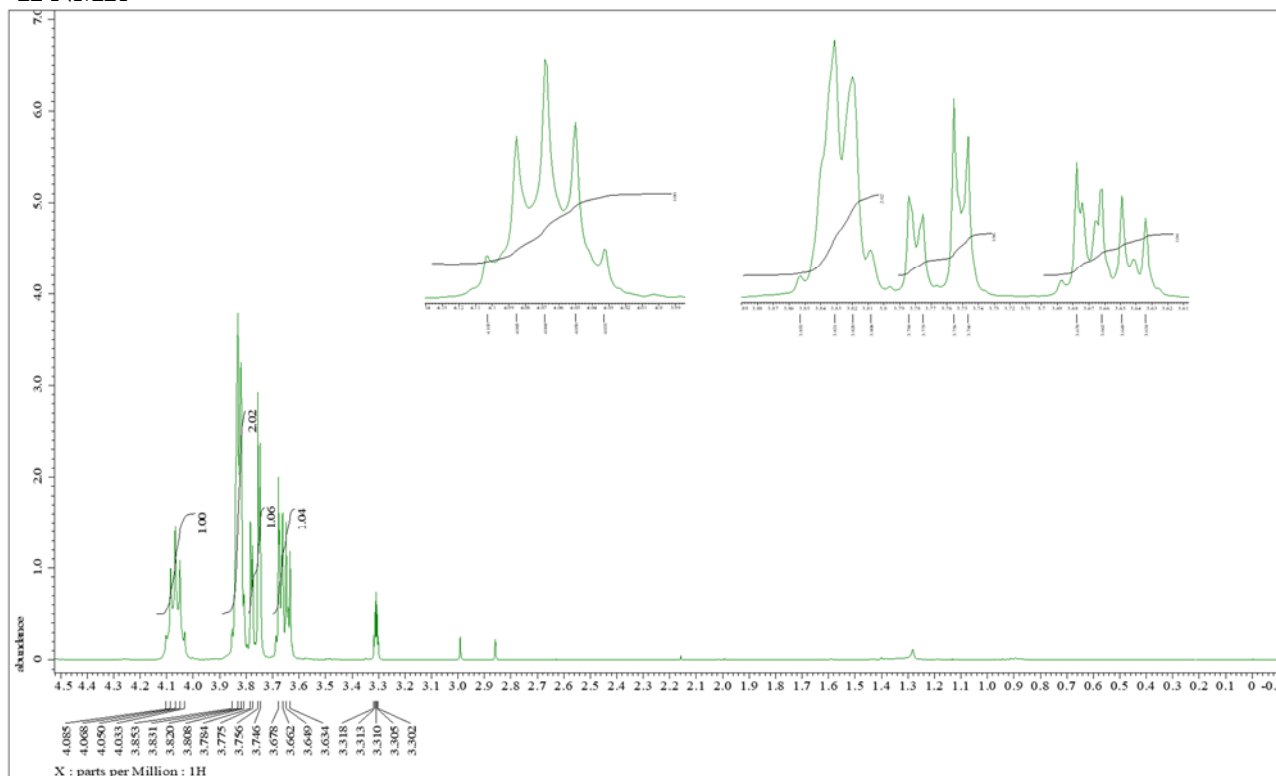

<sup>13</sup>C NMR

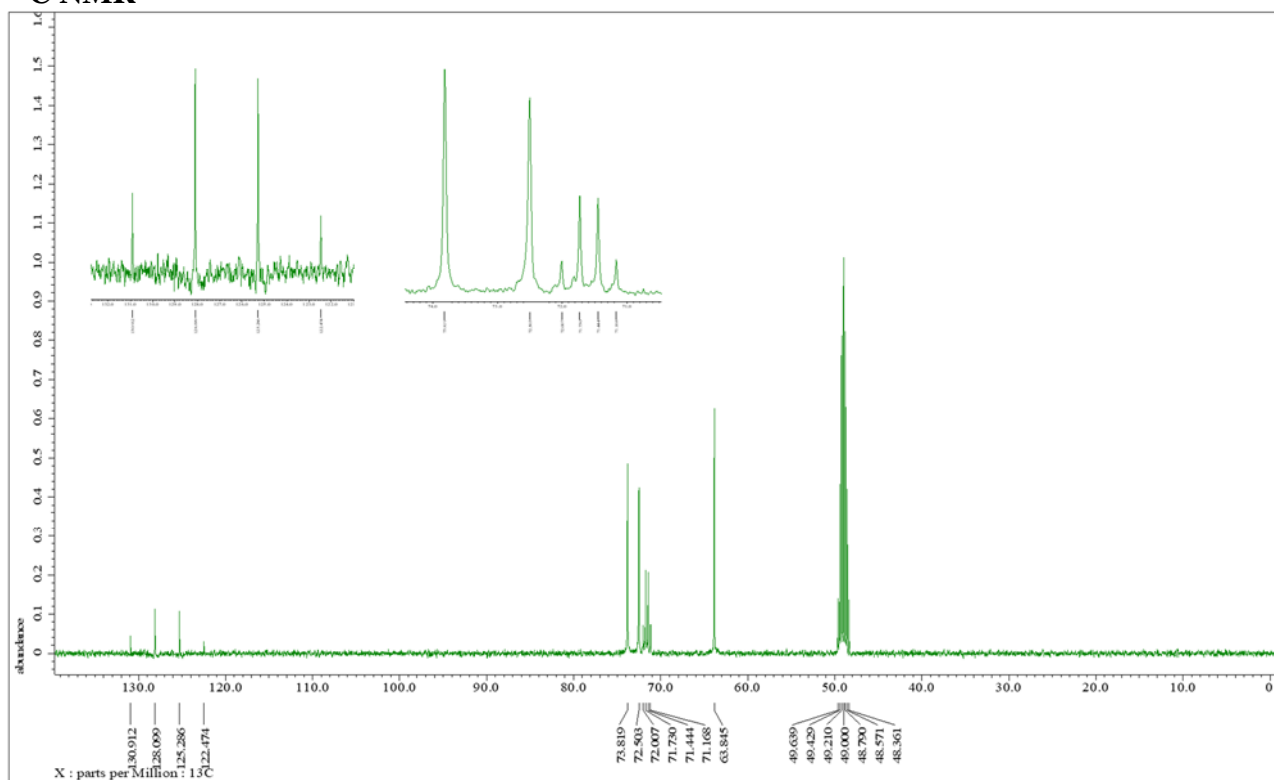

# <sup>19</sup>F NMR

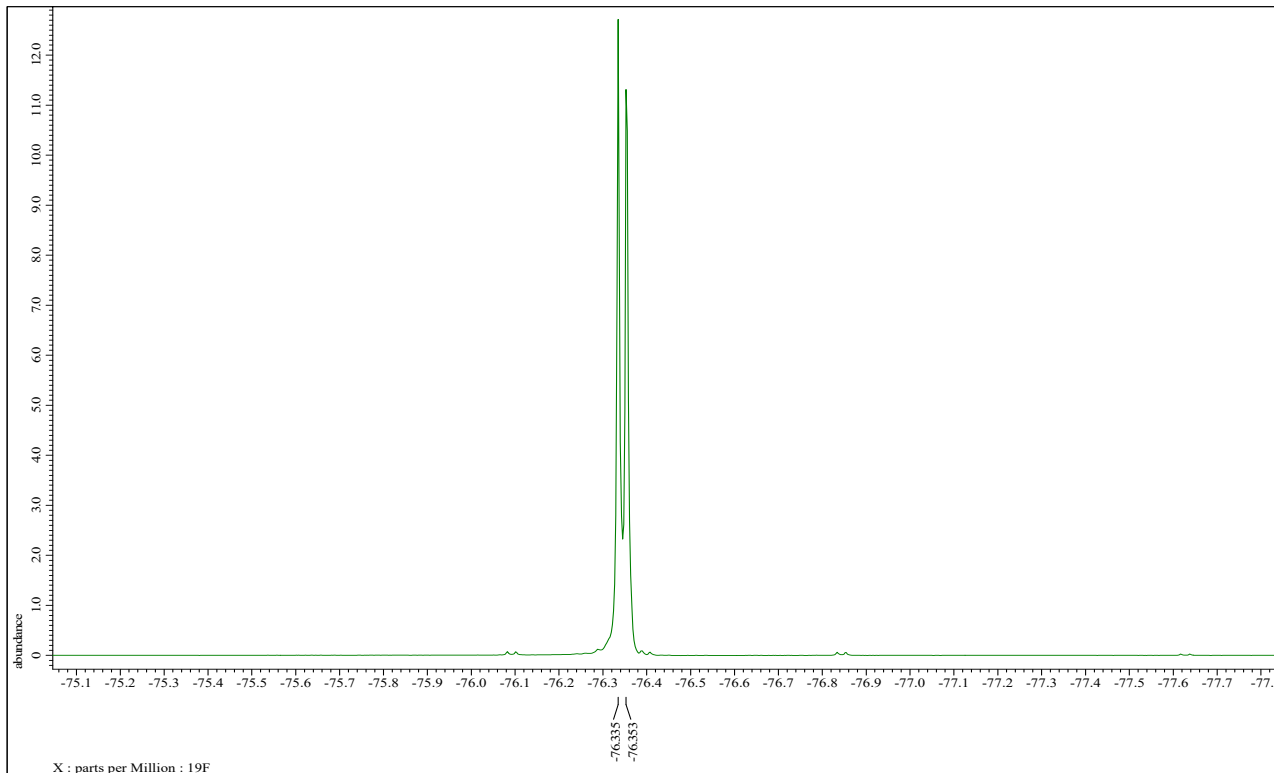

# HRMS

## Elemental Composition Report

### Single Mass Analysis

Tolerance = 500.0 PPM / DBE: min = -10.0, max = 100.0

Element prediction: Off

Number of isotope peaks used for i-FIT = 3

Monoisotopic Mass, Even Electron Ions

2 formula(e) evaluated with 1 results within limits (all results (up to 1000) for each mass)

Elements Used:

C: 5-5 H: 9-10 O: 4-4 F: 3-3 Na: 0-1

20190410-6 10 (0.353) Cm (9:13)

1: TOF MS ES+

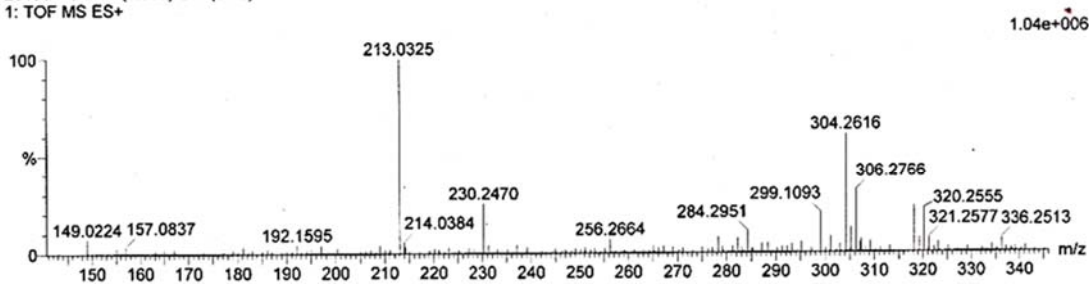

Minimum: -10.0  
Maximum: 100.0 500.0 100.0

| Mass     | Calc. Mass | mDa  | PPM   | DBE  | i-FIT | i-FIT (Norm) | Formula        |
|----------|------------|------|-------|------|-------|--------------|----------------|
| 213.0325 | 213.0351   | -2.6 | -12.2 | -0.5 | 484.4 | 0.0          | C5 H9 O4 F3 Na |

# IR

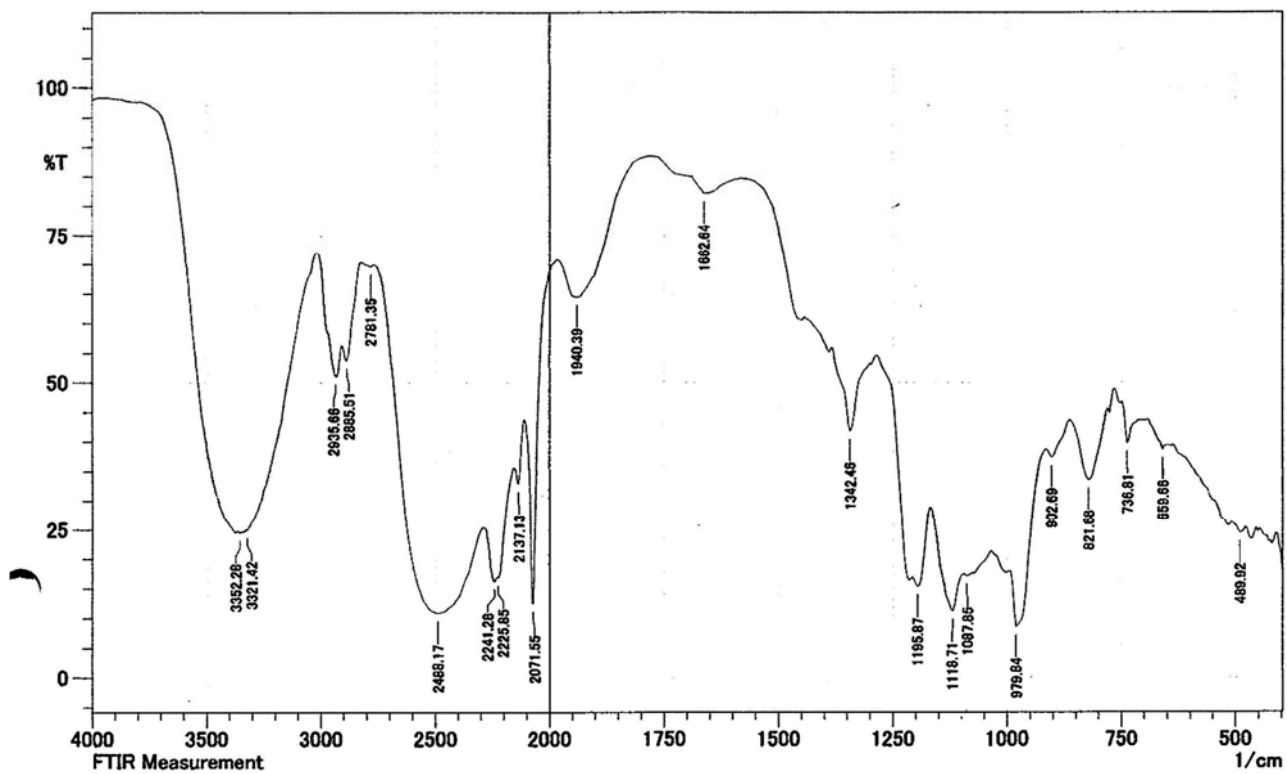



(2*R*,3*R*,4*R*)-5,5,6,6,6-Pentafluorohexane-1,2,3,4-tetraol (6b)

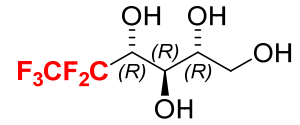

<sup>1</sup>H NMR

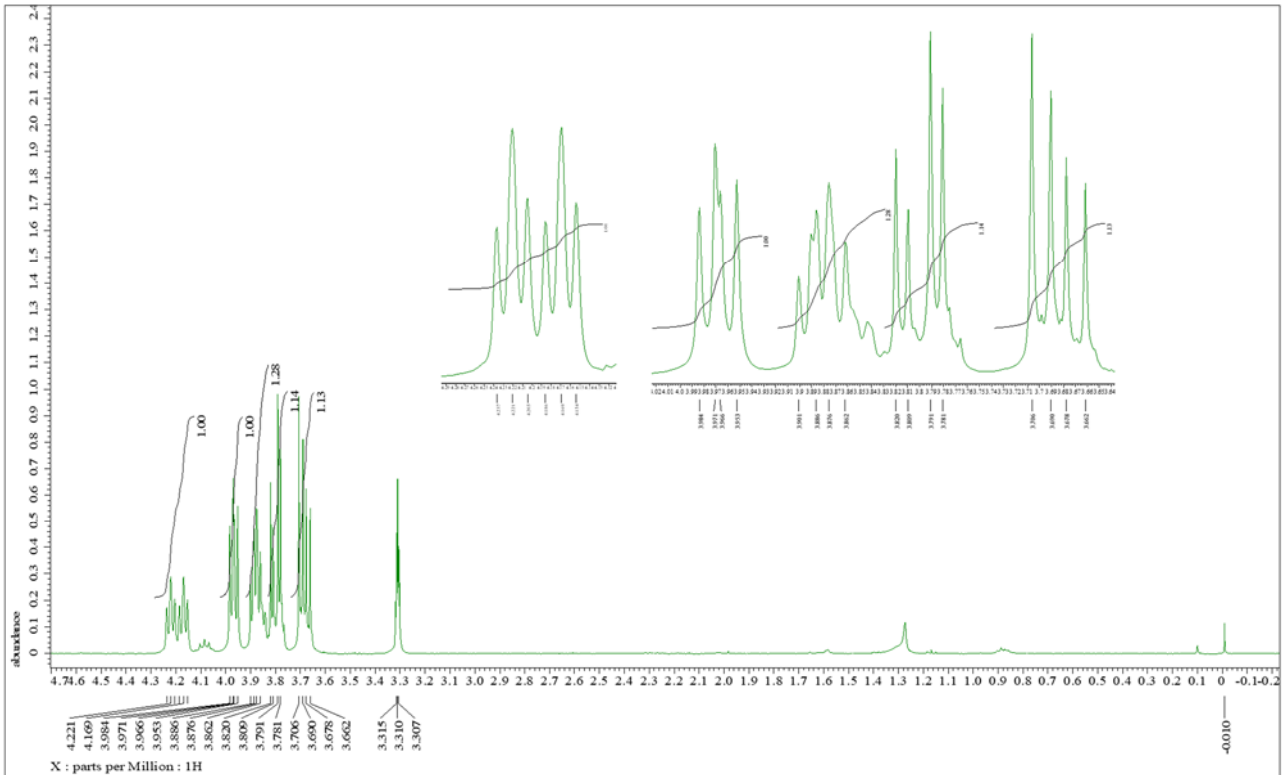

<sup>13</sup>C NMR

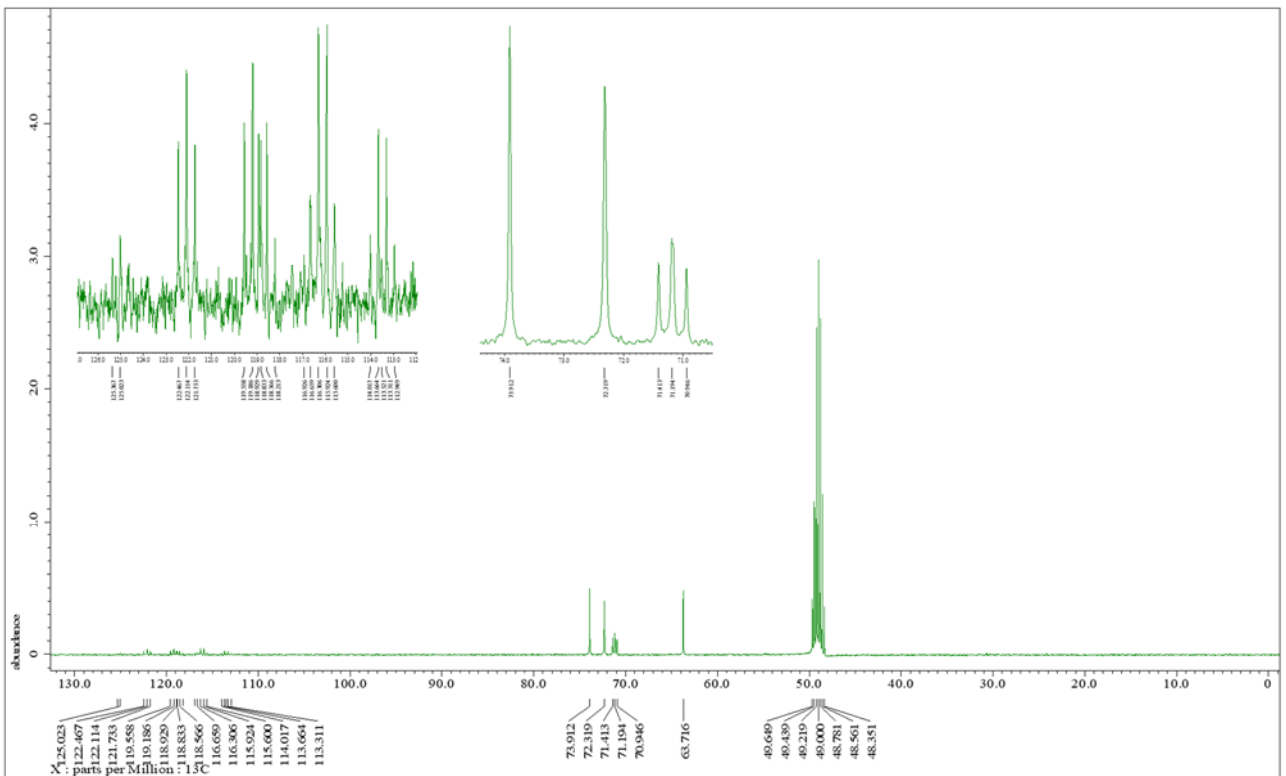

# <sup>19</sup>F NMR

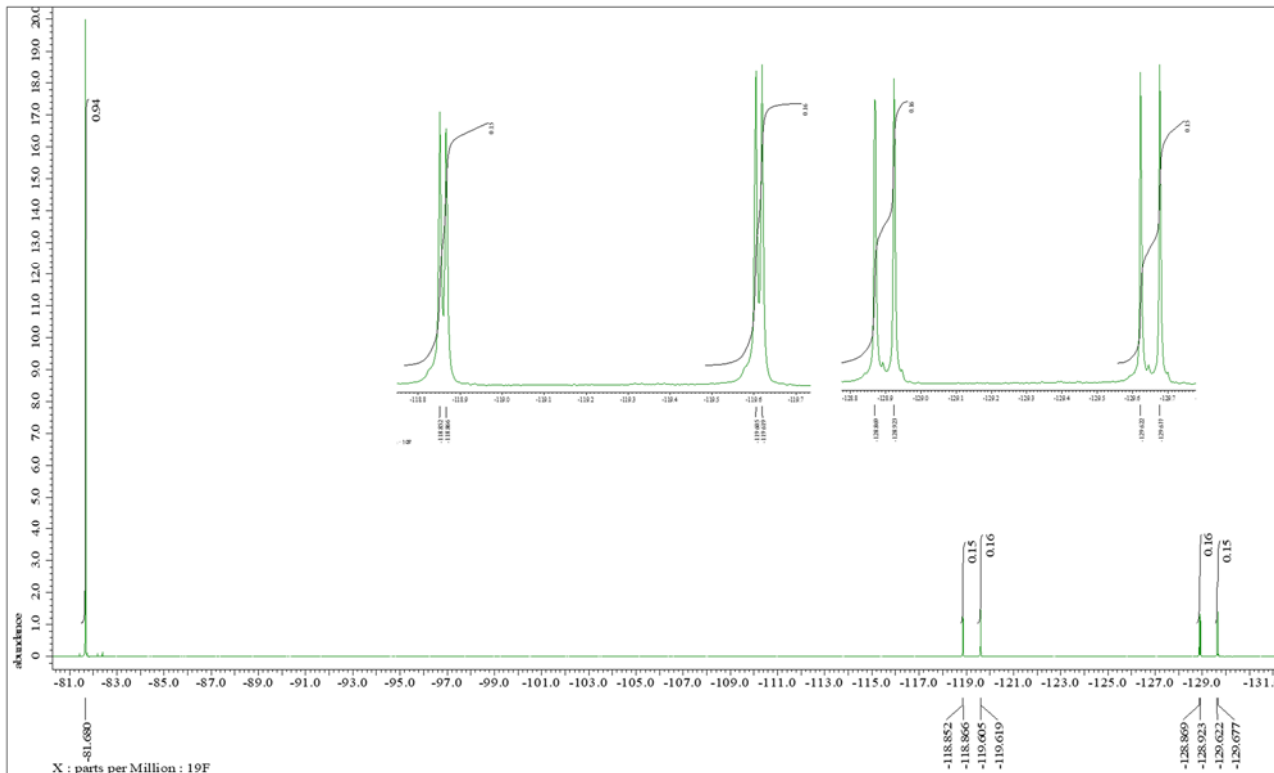

# HRMS

## Elemental Composition Report

### Single Mass Analysis

Tolerance = 100.0 PPM / DBE: min = -10.0, max = 100.0

Element prediction: Off

Number of isotope peaks used for i-FIT = 3

Monoisotopic Mass, Even Electron Ions

3 formula(e) evaluated with 1 results within limits (all results (up to 1000) for each mass)

Elements Used:

C: 6-6 H: 9-9 14N: 0-2 O: 4-4 19F: 5-5 Na: 0-1

20190708p-6 11 (0.387)

1: TOF MS ES+

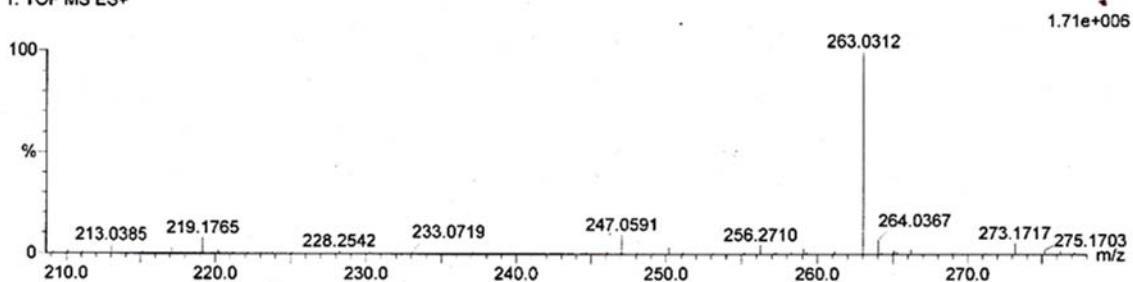

Minimum: -10.0  
Maximum: 100.0

| Mass     | Calc. Mass | mDa  | PPM  | DBE  | i-FIT | i-FIT (Norm) | Formula          |
|----------|------------|------|------|------|-------|--------------|------------------|
| 263.0312 | 263.0319   | -0.7 | -2.7 | -0.5 | 533.4 | 0.0          | C6 H9 O4 19F5 Na |

# IR

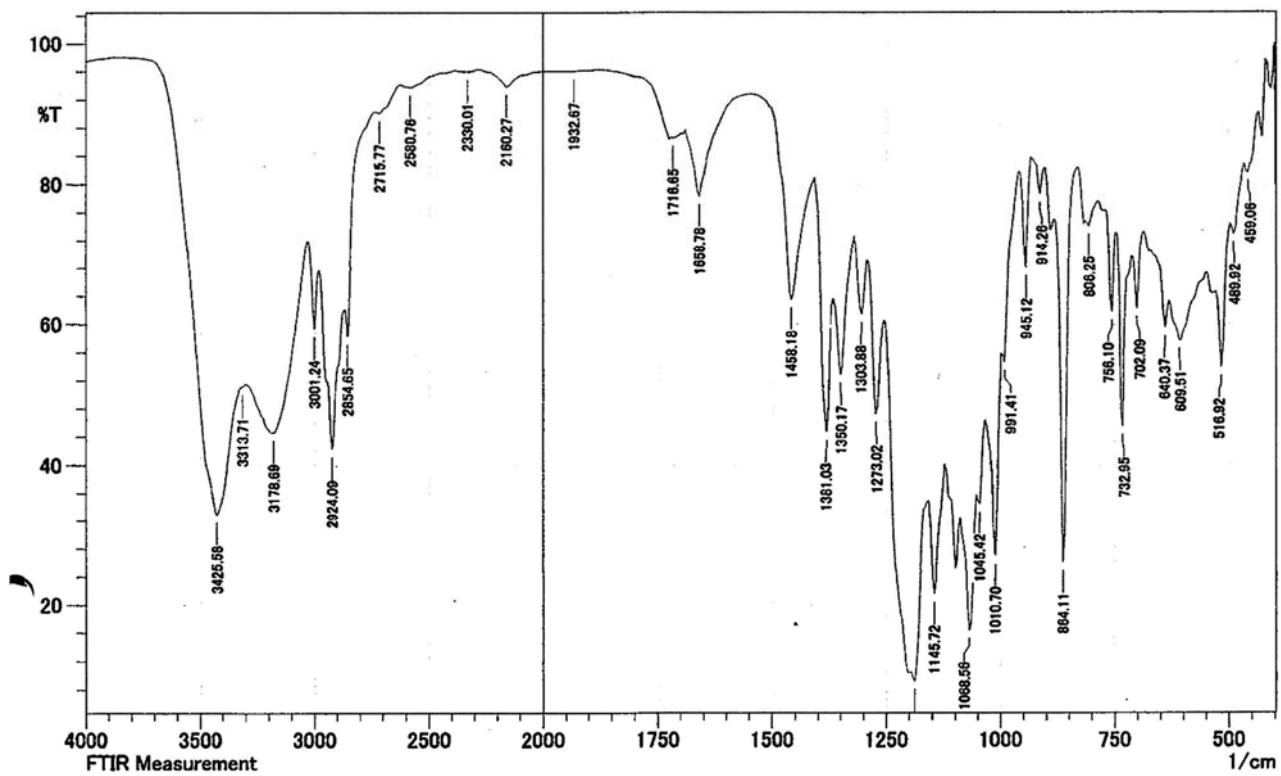

## Enantiomer separation by GC

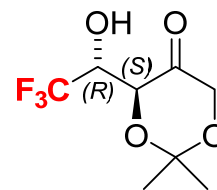

### Enantiomer separation of *anti*-4a:

CHIRAL GC (GL Sciences InterCap CHIRAMIX column, temperature : 80-140 °C (1°C/min), muscle : 74.4 kPa, total flow : 26.0 mL/min, column flow : 0.89 mL/min, linear velocity : 25.7 cm/sec, purge flow : 3.0 mL/min, split fraction : 24.8), t<sub>1</sub> (major enantiomer) = 46.1 min, t<sub>2</sub> (minor enantiomer) = 46.6 min.

### Racemate

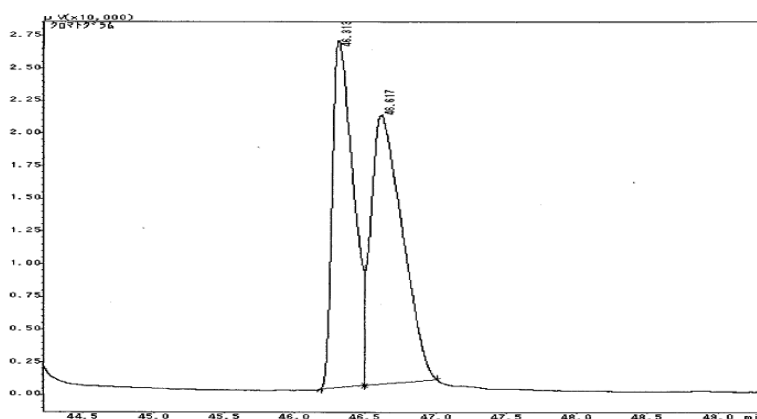

| peak  | Retention time | area   | height | area   |
|-------|----------------|--------|--------|--------|
| 1     | 46.313         | 276920 | 26546  | 46.551 |
| 2     | 46.617         | 317960 | 20589  | 53.449 |
| total |                | 594880 | 47135  |        |

### Chiral compound

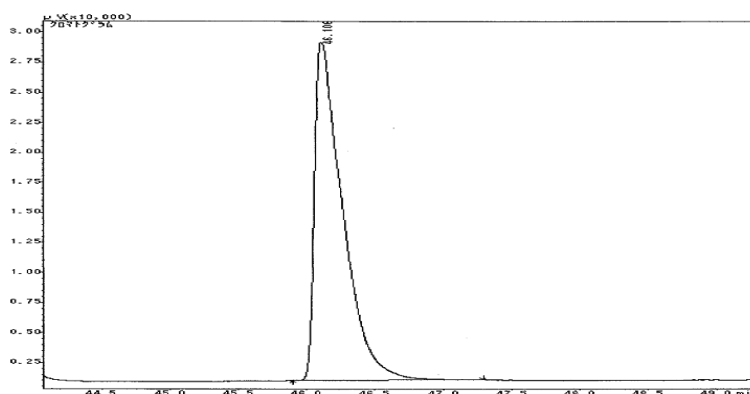

| peak  | Retention time | area   | height | area    |
|-------|----------------|--------|--------|---------|
| 1     | 46.106         | 402447 | 28164  | 100.000 |
| total |                | 402447 | 28164  |         |

## Enantiomer separation by HPLC

### Enantiomer separation of ester of *anti*-4a:

After esterification of **4a** with 4-bromobenzoyl chloride in the presence of pyridine, ee was measured in HPLC with CHIRALCEL AD-H

(Daicel, 0.46 cm  $\phi$  x 25cmL) column on a SHIMADZU LC-20AT

liquid chromatograph, column temperature : 40 °C, flow solvent : hexane/*i*-PrOH = 95/5, column flow : 1.0 mL/min, detection wavelength : 237 nm,  $t_1$  (major enantiomer) = 5.7 min,  $t_2$  (minor enantiomer) = 6.5 min.

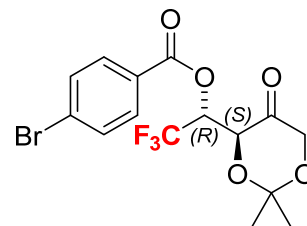

### Racemate

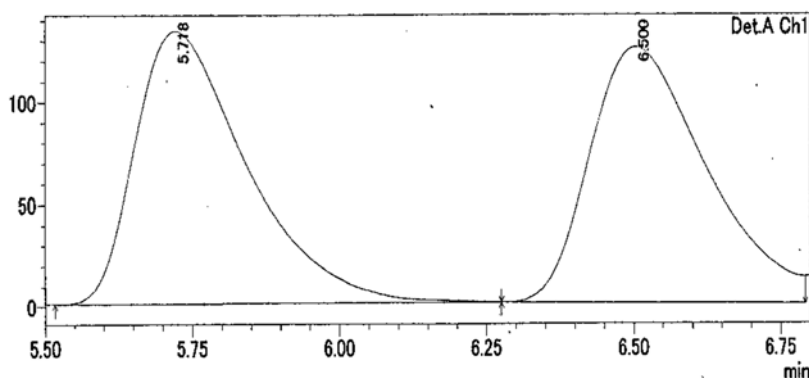

| peak  | Retention time | area    | height | area%   |
|-------|----------------|---------|--------|---------|
| 1     | 5.718          | 1769454 | 133443 | 50.620  |
| 2     | 6.500          | 1726079 | 125155 | 49.380  |
| total |                | 3495533 | 258598 | 100.000 |

### Chiral compound

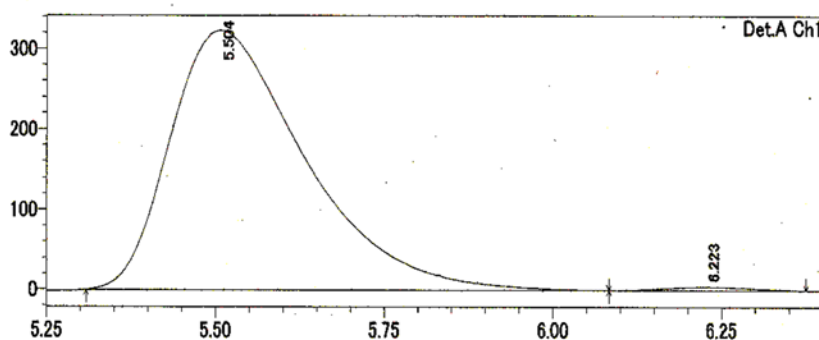

| peak  | Retention time | area    | height | area%   |
|-------|----------------|---------|--------|---------|
| 1     | 5.504          | 4500131 | 323800 | 99.170  |
| 2     | 6.223          | 37667   | 4051   | 0.830   |
| total |                | 4537798 | 327851 | 100.000 |

## Enantiomer separation by GC

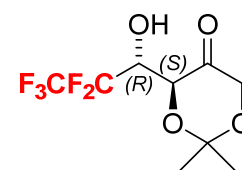

### Enantiomer separation of *anti*-4b:

CHIRAL GC (GL Sciences InterCap CHIRAMIX column,

temperature : 80-140 °C (1°C/min), muscle : 89.9 kPa, total flow : 27.4 mL/min, column flow : 0.95 mL/min, linear velocity : 25.7 cm/sec, purge flow : 3.0 mL/min, split fraction : 24.8),  $t_1$  (major enantiomer) = 42.6 min,  $t_2$  (minor enantiomer) = 42.9 min.

### Racemate

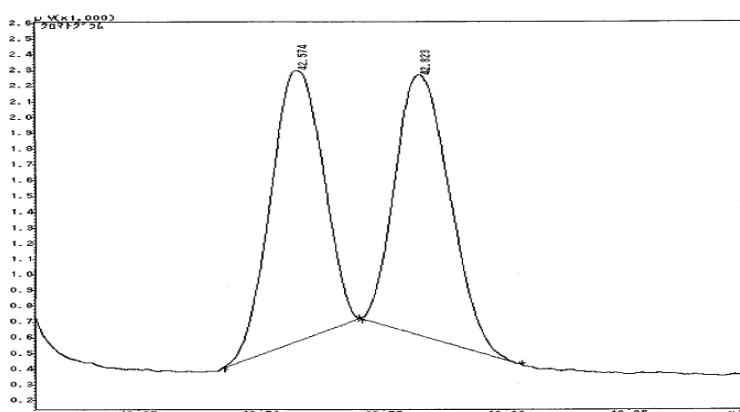

| peak  | Retention time | area  | height | area   |
|-------|----------------|-------|--------|--------|
| 1     | 42.574         | 12841 | 1721   | 49.918 |
| 2     | 42.823         | 12883 | 1657   | 50.082 |
| total |                | 25724 | 3378   |        |

### Chiral compound

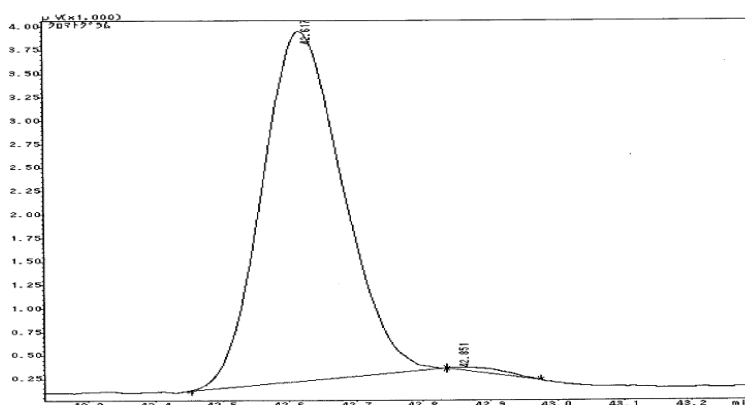

| peak  | Retention time | area  | height | area   |
|-------|----------------|-------|--------|--------|
| 1     | 42.617         | 31243 | 3718   | 99.263 |
| 2     | 42.851         | 232   | 24     | 0.737  |
| total |                | 31475 | 3742   |        |
